# Supplementary material for: Cognitive behaviour therapy in medication-treated adults with ADHD and persistent Symptoms: A randomized controlled trial
Source: Springer Nature journal article supplement (doi:10.1186/1471-244x-11-116), 2011-07-25

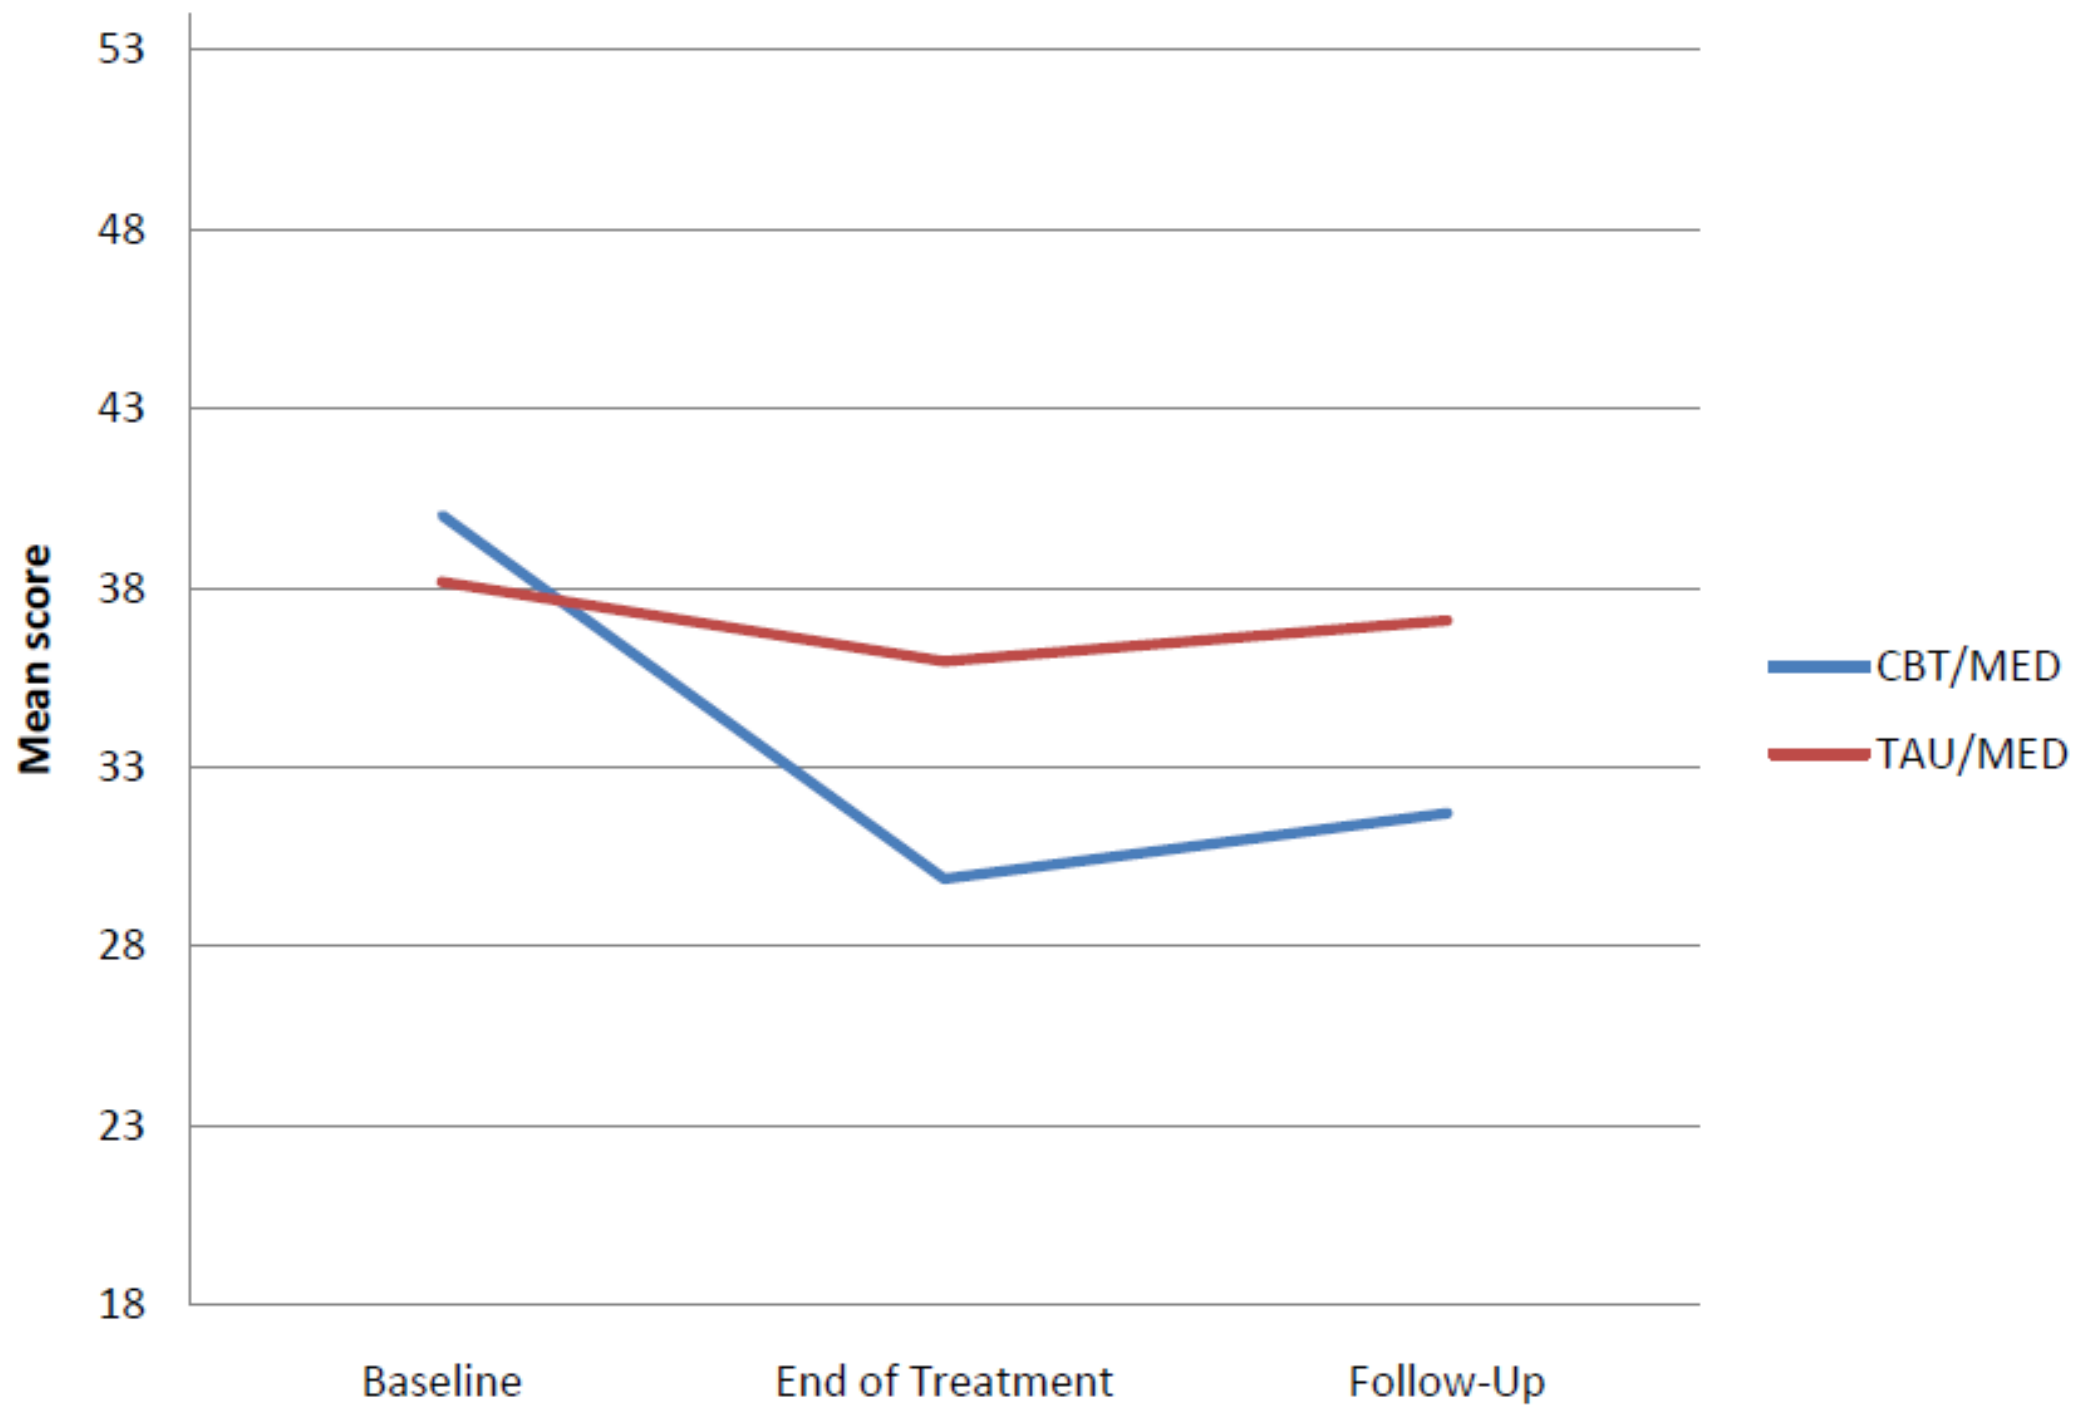

Supplement: 12888_2011_856_MOESM2_ESM.pdf [file 12888_2011_856_MOESM2_ESM.pdf]
